# Supplementary material for: The photoinitiated cyclopolymerization of dienes in the creation of novel polymeric systems and three-dimensional networksElectronic supplementary information (ESI) available: Experimental details. See http://www.rsc.org/suppdata/jm/b4/b402154c/
Source: Royal Society of Chemistry journal article supplement (doi:10.1039/b402154c), 2004-01-01
Supplement: b402154c.doc [file b402154c.doc]

# Supplementary

# Material Preparation and Rates of Polymerization

In the following sections, for practical reasons, we will focus on seven atom centred systems based on substituted diallylamine, its quaternary ammonium salts and diallylamides, *ie* based on structures **8** to **10**. This is because the five- and six atom centred systems, **1** to **3**, and the seven atom centred systems **4** to **7** **polymerise relatively slowly**. In the case of diallylamine itself, and its free base derivatives, polymerization is also slow, but when an electron withdrawing group at, or near to, the nitrogen atom is introduced the **cyclopolymerization reaction is greatly accelerated**. Indeed, we discovered that “neat” or highly concentrated solutions of diallylamine salts and diallylamide monomers polymerize and co-polymerize very easily in the presence of commercial photoinitiators, such as 1-hydroxycycloyhexylphenyl ketone Irgacure 184 (Ciba) to give materials that are suitable for coatings and adhesives. Polymerization was effected in sunlight or by the use of a domestic low-power Philips Home Solaria (75 W) Ultra-violet A (UVA) sunlamp with a broad spectral range (320-400 nm). In fact polymerization was most easily achieved, and with the best results, when a broad range of wavelengths of light were used in the photo-cyclization reaction rather than a single wavelength tuned to the photoinitiator. This observation suggests that the excited states of the dienes probably play an important role in the reaction mechanism. A typical preparation procedure is thus given as follows:

*Synthesis of* Bis*-1,10-(diallylamino)decane:* Diallylamine (6.45 g, 0.066 mol), 1,10-dibromodecane (10 g, 0.033 mol) and potassium carbonate (9.7 g, 0.066 mol) were stirred in ethanol (60 cm3), and the resulting mixture was refluxed for 10 h. The solids were removed by filtration and the solvent removed *in vacuo* to leave a yellow oil. The oil was purified by column chromatography over silica gel using ethyl acetate as the eluent, to leave, after removal of solvent *in vacuo*, 9.80g, 89% of a yellow oil of *bis*-1,10-(diallylamino)decane. H (400 MHz,CDCl3): 1.15-1.30 (m, 12H), 1.35-1.45 (m, 4H), 2.40 (t, 4H), 3.10 (d, 8H), 5.05-5.20 (m, 8H), 5.30-5.55 (m, 4H), max (thin film): 2920, 2850, 2800, 1640, 1460, 1440, 1350, 1250, 1150, 1110, 990, 915cm-1.

*Synthesis of the ionic fluid bis-1,10-(diallylammonium)decane* *phosphorus hexafluoride:* *Bis*-1,10-(diallylammonium)decane (5.0 g, 0.015 mol) was treated with an aqueous methanolic solution of hexafluorophosphoric acid (3.0 M methanol solution) to pH 1. The PF6- salt was extracted using dichloromethane (2 x 100 cm3) and the combined extracts were dried over MgSO4. Removal of solvent left a yellow oil. 9.16g, 96%. H (400 MHz, CDCl3): 1.25 (s, br, 12H), 1.65 (s, br, 4H), 2.95 (s, br, 4H), 3.65 (s, br, 8H), 5.60 (m, 8H), 5.90 (m, 4H), 9.75 (s, br, 2H). max (KCl disc): 3508, 3199, 2931, 2859, 2663, 1691, 1648, 1469, 1427, 1290, 1142, 1049, 996, 953, 842.6(s), 737cm-1.

*Polymerization of the ionic fluid:* Approximately 1% by wt of photoinitiator Irgacure 184 (Ciba) was added to the salt, and after stirring the mixture was spread onto a suitable substrate, usually glass in our case. Polymerization was then effected using a domestic low-power (75 W) UVA sunlamp.

## Comparison of Cure Speeds

The cure speed and the physical properties of the monomers are, to a large extent, dominated by the diene groups. The cure characteristics were measured by impedance spectroscopy, using a Solartron SI 1296 Dielectric Interface connected to a computer via a Solartron SI 1260 Impedance/Gain analyser. The sample materials were placed in an ITO coated glass cell, typically with a cell spacing of 25 m. The results obtained for three dimeric materials (**a**, **b**, and **c**) with different bridging groups in the formation of polymeric networks are shown in figure 1. The selected bridging units were an ether linkage (**a**), a short methylene spacer (**b**), and a long chain aliphatic unit (**c**). The cure characteristics of hexyl acrylate and Norland 71 are also shown under identical conditions. The conditions used for the cyclopolymerization were 2 weight percent Irgacure 819 (Ciba), in a mixture with the neat dimer, with the resulting mixture being illuminated with a 75 mW/cm2 (spectrally integrated power) lamp.

**Figure 1:** Cure speed of selected dimers compared to some commercially available systems

It can be seen that the cure characteristics of the three diene based materials are very similar, and lie within the noise of the experiment. This leads us to conclude that the cure speed is independent of the bridging group - one of the most important features of this system. It can also be seen that the materials require longer cure times than acrylate based systems. The cure time is not prohibitively longer, however, and it is comparable with some other commercially available UV curable systems. A more detailed analysis of the cure rates for compounds **a**, **b** and **c** are shown in figure 2.

**Figure 2:** Cure rate as a function of time for dimers **a**, **b** and **c**

Furthermore, it was found that although diallylammonium salts and diallylamides do not photopolymerize quite as quickly as acrylates or methacrylates, the resultant polymers show low shrinkage, good adhesion to most surfaces, particularly metals, and are virtually odourless.
